# Supplementary material for: Porous and Close Packed Supramolecular Assemblies from 2,4-Difluoronitrobenzene with Three Different Linkers and an n-Butylamine Cap
Source: MDPI journal article supplement (doi:10.3390/ijms241914683), 2023-09-28
Supplement: s1 [file ijms-2634960-supplementary.pdf › ijms-2634960-supplementary.pdf]

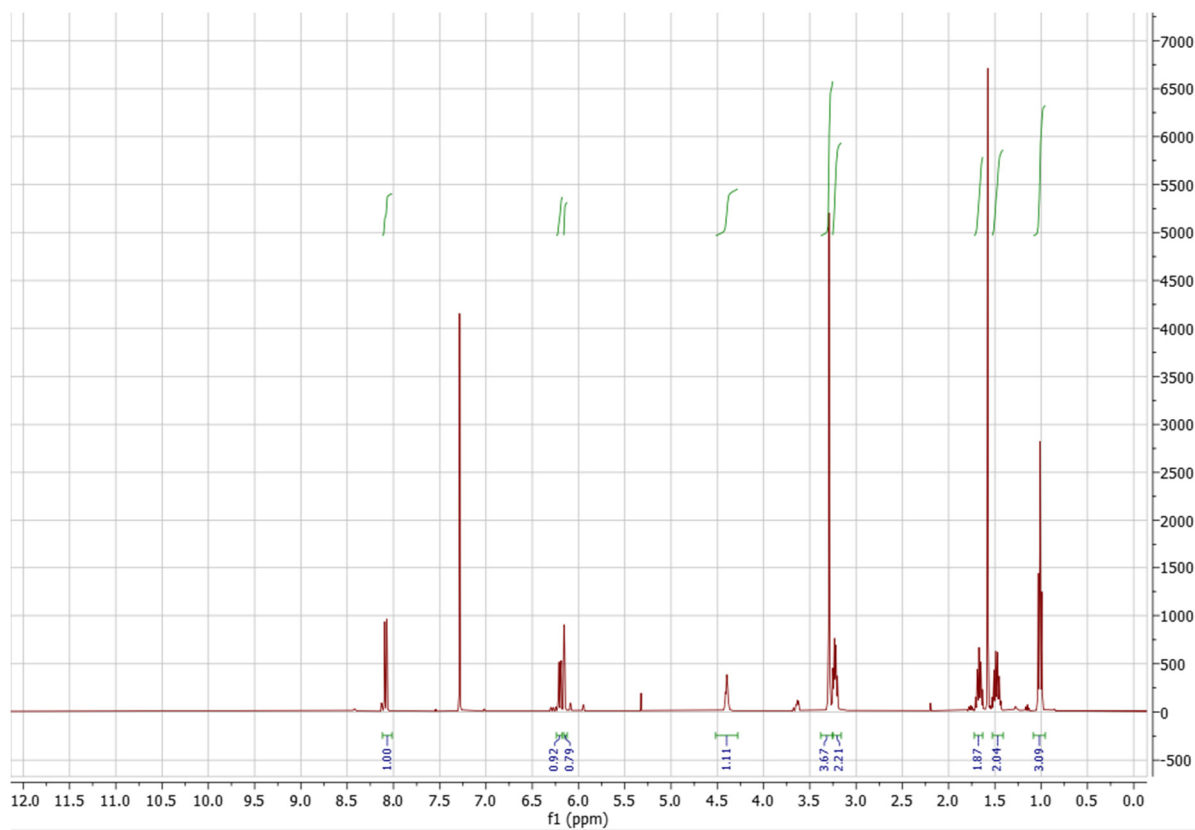

**Figure S1.** Compound **14** 400 MHz Proton NMR (CDCl<sub>3</sub>) Full Spectrum 0-12 ppm

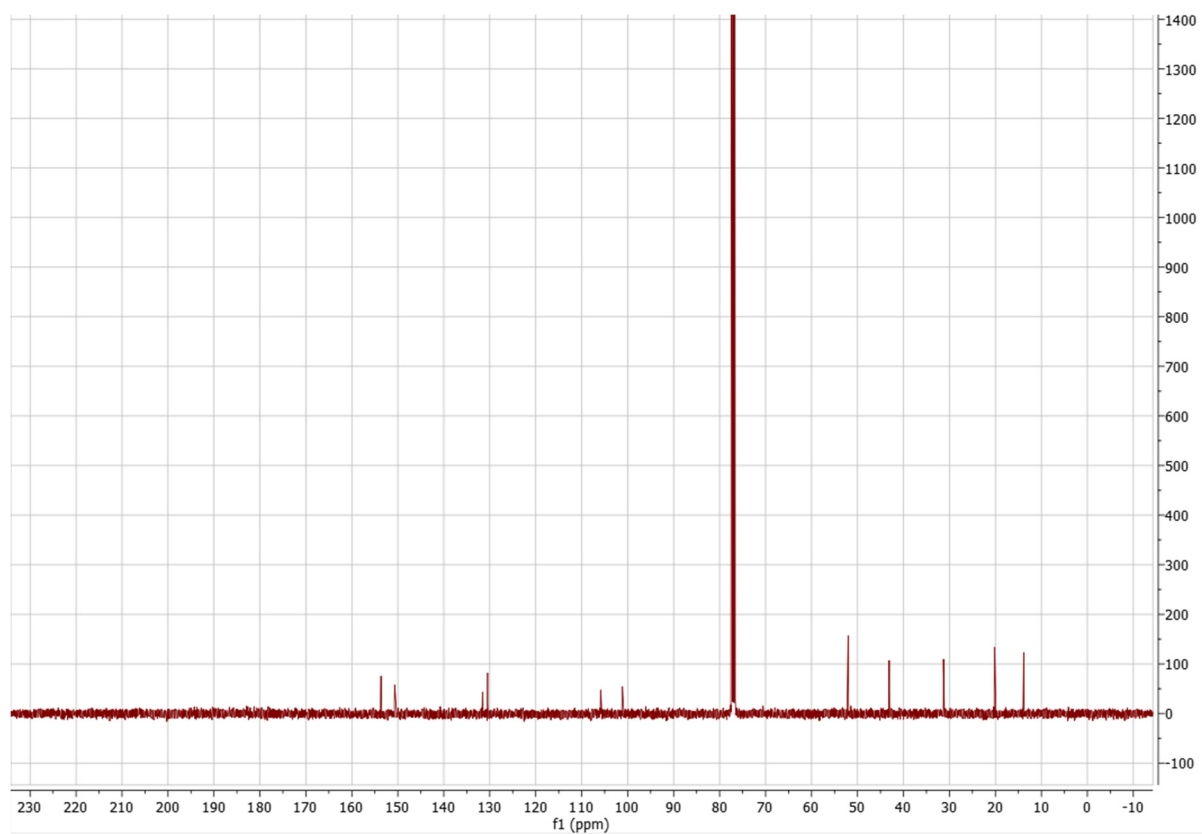

**Figure S2.** Compound **14** 400 MHz Carbon 13 NMR (CDCl<sub>3</sub>)

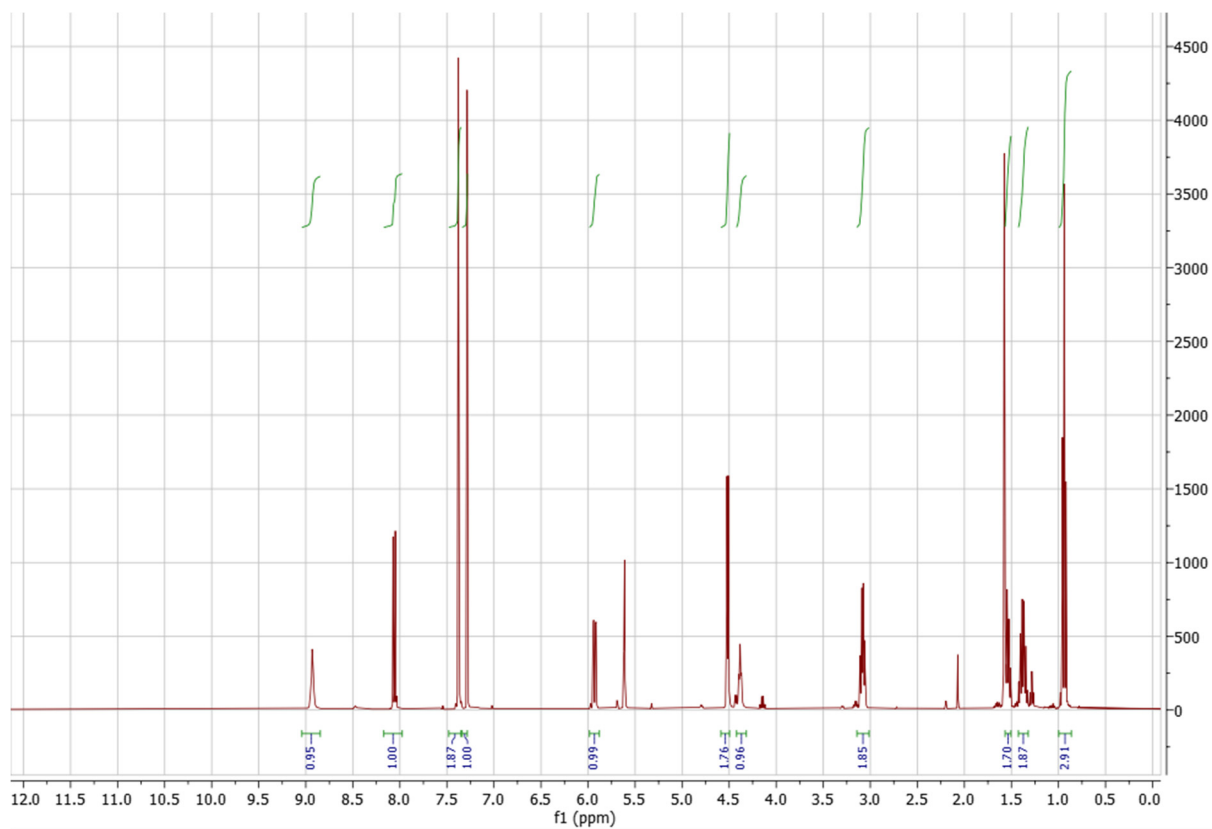

**Figure S3.** Compound **16** 400 MHz Proton NMR (CDCl<sub>3</sub>) Full Spectrum 0-12 ppm

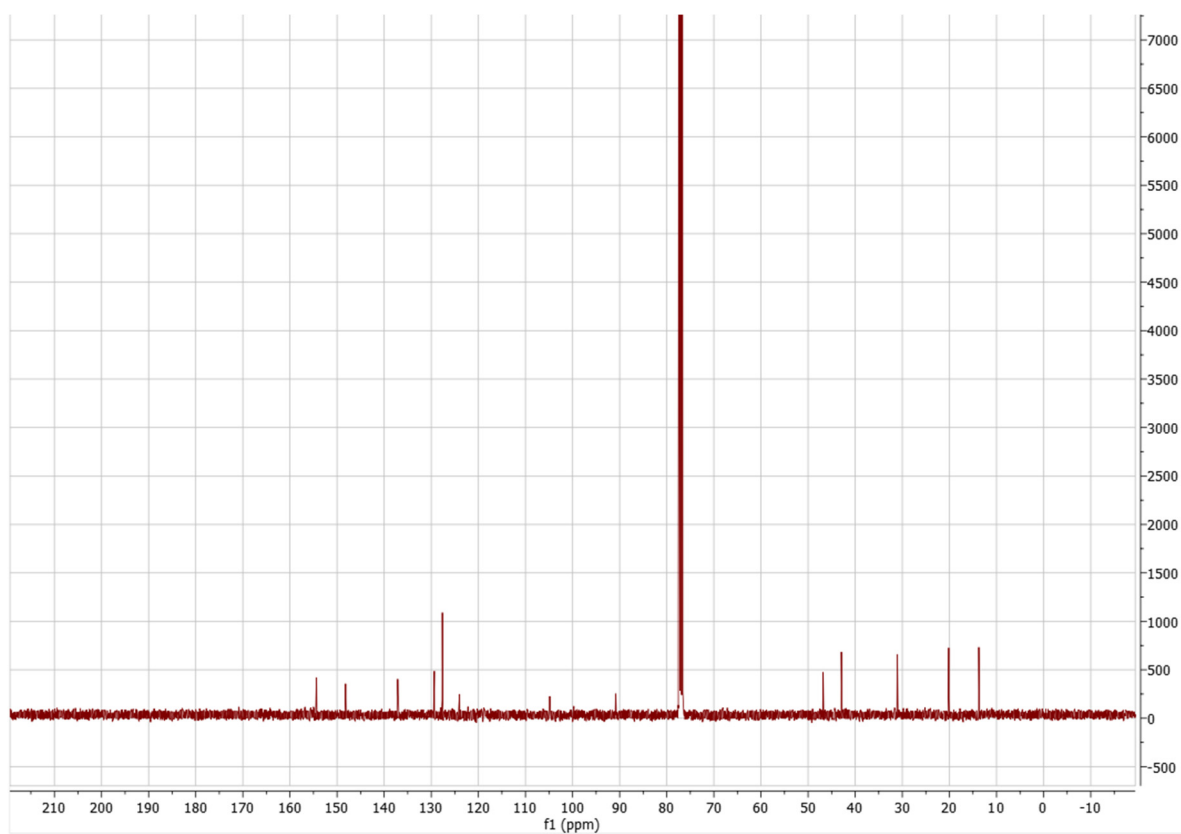

**Figure S4.** Compound **16** 400 MHz Carbon 13 NMR (CDCl<sub>3</sub>)
